# Supplementary material for: ρ0 Cells Feature De-Ubiquitination of SLC Transporters and Increased Levels and Fluxes of Amino Acids
Source: MDPI journal article supplement (doi:10.3390/ijms18040879), 2017-04-20
Supplement: s1 [file s1]

# **De-ubiquitination of SLC transporters leads to increased levels and fluxes of amino acids in human osteosarcoma p<sup>0</sup> cells**

Andre Medina<sup>1</sup>, Marcin Banaszczak<sup>1,2</sup>, Yang Ni<sup>1</sup>, Ina Aretz<sup>1</sup>, and David Meierhofer<sup>1\*</sup>

Supplementary Tables. This material is available free of charge via the Internet at <http://pubs.acs.org>.

**Supplementary Table S1:** De-ubiquitination of SLC transporters in p0 versus 143B.TK<sup>-</sup> cells. SLC transporters, including the specific site of ubiquitination are indicated with mean fold changes, 1/fold changes and SD.

**Supplementary Table S2:** Integrated peak areas in counts per second (cps) for all six biological replicates (A-F) for each detected amino acid in p<sup>0</sup> and 143B.TK<sup>-</sup> cells at time points 2.5, 5, 10, and 20 minutes. Data are normalized for protein content and internal standard, n=6.

**Supplementary Table S3:** Concentration of amino acids in <sup>13</sup>C<sup>15</sup>N and <sup>12</sup>C<sup>14</sup>N labeled cell culture media.

**Supplementary Table S4:** Integrated peak areas in counts per second (cps) for all three biological replicates (A-C) for each detected <sup>13</sup>C<sup>15</sup>N labeled amino acid in p<sup>0</sup> and 143B.TK<sup>-</sup> cells at time points 0 (control without GPNA) and after 10 minutes incubation with the SLC inhibitor GPNA. Data are normalized for protein content and internal standard, n=3.

**Supplementary Table S5:** List of all amino acids and their <sup>13</sup>C<sup>15</sup>N labeled forms with transitions, MS conditions and MRM ion ratios.
