# Supplementary material for: ρ0 Cells Feature De-Ubiquitination of SLC Transporters and Increased Levels and Fluxes of Amino Acids
Source: Int J Mol Sci. 2017 Apr 20;18(4):879. doi: 10.3390/ijms18040879 (PMC5412460; doi:10.3390/ijms18040879)
Supplement: Supplementary file 1 [file ijms-18-00879-s001.zip]

Archive with 6 entries (6 files):
- Supplementary Table S4.xlsx
- Supplementary Table S5.xlsx
- Supporting tables content.pdf
- Supplementary Table S1.xlsx
- Supplementary Table S2.xlsx
- Supplementary Table S3.xlsx
