# Supplementary material for: ρ0 Cells Feature De-Ubiquitination of SLC Transporters and Increased Levels and Fluxes of Amino Acids
Source: Int J Mol Sci. 2017 Apr 20;18(4):879. doi: 10.3390/ijms18040879 (PMC5412460; doi:10.3390/ijms18040879)
Supplement: Supplementary file 1 [file ijms-18-00879-s001.zip › Supplementary Table S1.xlsx]

## Sheet: Sheet1
Supplementary Table S1. De-ubiquitination of SLC transporters in ρ0 versus 143B.TK- cells. SLC transporters, including the specific site of ubiquitination are indicated with mean fold changes, 1/fold changes and SD.
SLC transporters and ubi-sites	Mean of fold changes ρ0/143B.TK-	1/fold change de-ubiquitination	Standard deviation of fold changes	Information
SLC1A4-K528	0.366933	2.72529	0.119955	SLC1A4 - solute carrier family 1 (glutamate/neutral amino acid transporter), member 4; Transporter for alanine, serine, cysteine, and threonine. Exhibits sodium dependence
SLC1A5-K502	0.123355	8.1067	n/a	SLC1A5 - solute carrier family 1 (neutral amino acid transporter), member 5
SLC1A5-K522	0.254209	3.93377	0.0825162
SLC1A5-K537	0.2007	4.98255	0.114848
SLC2A1-K245	0.278497	3.59071	0.0341532	SLC2A1 - solute carrier family 2 (facilitated glucose transporter), member 1; Facilitative glucose transporter. This isoform may be responsible for constitutive or basal glucose uptake. Has a very broad substrate specificity; can transport a wide range of aldoses including both pentoses and hexoses
SLC2A1-K477	0.146512	6.8254	0.0284661
SLC2A3-K477	0.156884	6.37416	0.107571	SLC2A3 - solute carrier family 2 (facilitated glucose transporter), member 3; Facilitative glucose transporter. Probably a neuronal glucose transporter
SLC2A3-K490	0.19208	5.20616	n/a
SLC3A2-K10	0.607635	1.64572	0.133806	SLC3A2 - solute carrier family 3 (activators of dibasic and neutral amino acid transport), member 2; Required for the function of light chain amino-acid transporters. Involved in sodium-independent, high-affinity transport of large neutral amino acids such as phenylalanine, tyrosine, leucine, arginine and tryptophan. Involved in guiding and targeting of LAT1 and LAT2 to the plasma membrane. When …
SLC3A2-K21	0.414931	2.41004	0.142557
SLC3A2-K91	0.414931	2.41004	0.142557
SLC3A2-K109	0.168919	5.91999	0.0970688
SLC3A2-K116	0.11815	8.46384	0.0319496
SLC4A7-K737	0.632897	1.58004	0.0495839	SLC4A7 - solute carrier family 4, sodium bicarbonate cotransporter, member 7
SLC4A7-K753	0.74922	1.33472	n/a
SLC4A7-K758	0.5676	1.7618	0.0819027
SLC4A7-K768	0.324474	3.08191	0.0867691
SLC7A2-K461	0.259279	3.85686	0.218017	SLC7A2 - solute carrier family 7 (cationic amino acid transporter, y+ system), member 2; Low-affinity, high capacity permease involved in the transport of the cationic amino acids (arginine, lysine and ornithine). Plays a regulatory role in classical or alternative activation of macrophages (By similarity)
SLC7A2-K654	0.21342	4.6856	n/a
SLC7A5-K19	0.0970446	10.3045	0.0896987	SLC7A5 - solute carrier family 7 (amino acid transporter light chain, L system), member 5; Sodium-independent, high-affinity transport of large neutral amino acids such as phenylalanine, tyrosine, leucine, arginine and tryptophan, when associated with SLC3A2/4F2hc. Involved in cellular amino acid uptake. Acts as an amino acid exchanger. Involved in the transport of L-DOPA across the blood- brain …
SLC7A5-K30	0.107168	9.33113	0.0854895
SLC7A11-K30	0.1044	9.5785	n/a	SLC7A11 - solute carrier family 7 (anionic amino acid transporter light chain, xc- system), member 11; Sodium-independent, high-affinity exchange of anionic amino acids with high specificity for anionic form of cystine and glutamate
SLC12A2-K976	0.32484	3.07844	n/a	SLC12A2 - solute carrier family 12 (sodium/potassium/chloride transporters), member 2; Electrically silent transporter system. Mediates sodium and chloride reabsorption. Plays a vital role in the regulation of ionic balance and cell volume
SLC12A4-K1010	0.33924	2.94777	n/a	SLC12A4 - solute carrier family 12 (potassium/chloride transporters), member 4
SLC16A1-K473	0.112962	8.85255	0.0284076	SLC16A1 - solute carrier family 16, member 1 (monocarboxylic acid transporter 1); Proton-linked monocarboxylate transporter. Catalyzes the rapid transport across the plasma membrane of many monocarboxylates such as lactate, pyruvate, branched-chain oxo acids derived from leucine, valine and isoleucine, and the ketone bodies acetoacetate, beta-hydroxybutyrate and acetate
SLC16A1-K479	0.0893555	11.1913	0.0221388
SLC16A1-K487	0.109413	9.13968	0.0387452
SLC19A1-K479	0.501628	1.99351	0.540471	SLC19A1 - solute carrier family 19 (folate transporter), member 1; Transporter for the intake of folate. Uptake of folate in human placental choriocarcinoma cells occurs by a novel mechanism called potocytosis which functionally couples three components, namely the folate receptor, the folate transporter, and a V-type H(+)-pump
SLC20A1-K320	0.163818	6.10434	0.0128939	SLC20A1 - solute carrier family 20 (phosphate transporter), member 1; Sodium-phosphate symporter which plays a fundamental housekeeping role in phosphate transport, such as absorbing phosphate from interstitial fluid for normal cellular functions such as cellular metabolism, signal transduction, and nucleic acid and lipid synthesis. May play a role in extracellular matrix and cartilage calcificat…
SLC20A1-K441	0.172289	5.80421	0.0374363
SLC20A2-K262	0.095451	10.4766	0.0119488	SLC20A2 - solute carrier family 20 (phosphate transporter), member 2; Sodium-phosphate symporter which seems to play a fundamental housekeeping role in phosphate transport by absorbing phosphate from interstitial fluid for normal cellular functions such as cellular metabolism, signal transduction, and nucleic acid and lipid synthesis. In vitro, sodium-dependent phosphate uptake is not siginifican…
SLC20A2-K272	0.091405	10.9403	n/a
SLC20A2-K278	0.1539	6.49773	n/a
SLC26A2-K6	0.168367	5.93941	0.0838125	SLC26A2 - solute carrier family 26 (sulfate transporter), member 2; Sulfate transporter. May play a role in endochondral bone formation
SLC29A1-K249	0.188275	5.31139	0.0667004	SLC29A1 - solute carrier family 29 (nucleoside transporters), member 1; Mediates both influx and efflux of nucleosides across the membrane (equilibrative transporter). It is sensitive (ES) to low concentrations of the inhibitor nitrobenzylmercaptopurine riboside (NBMPR) and is sodium-independent. It has a higher affinity for adenosine. Inhibited by dipyridamole and dilazep (anticancer chemotherap…
SLC29A1-K255	0.189025	5.29029	0.0972903
SLC29A1-K263	0.134706	7.42357	0.0374681
SLC38A2-K33	0.402919	2.48189	0.0316197	SLC38A2 - solute carrier family 38, member 2; Functions as a sodium-dependent amino acid transporter. Mediates the saturable, pH-sensitive and electrogenic cotransport of neutral amino acids and sodium ions with a stoichiometry of 1:1. May function in the transport of amino acids at the blood- brain barrier and in the supply of maternal nutrients to the fetus through the placenta
SLC38A2-K38	0.386004	2.59065	0.167
SLC43A1-K233	0.241773	4.13611	0.0760988	SLC43A1 - solute carrier family 43, member 1; Sodium-independent, high affinity transport of large neutral amino acids. Has narrower substrate selectivity compared to SLC7A5 and SLC7A8 and mainly transports branched-chain amino acids and phenylalanine. Plays a role in the development of human prostate cancer, from prostatic intraepithelial neoplasia to invasive prostate cancer
SLC43A3-K249	0.146112	6.84407	0.0648747	SLC43A3 - solute carrier family 43, member 3; Putative transporter (By similarity)
SLC43A3-K255	0.13392	7.46716	0.0660209
SLC44A1-K648	0.16666	6.00024	n/a	SLC44A1 - solute carrier family 44, member 1; Choline transporter. May be involved in membrane synthesis and myelin production
SLCO4A1-K353	0.149462	6.69066	0.0625081	SLCO4A1 - solute carrier organic anion transporter family, member 4A1; Mediates the Na(+)-independent transport of organic anions such as the thyroid hormones T3 (triiodo-L-thyronine), T4 (thyroxine) and rT3, and of estrone-3-sulfate and taurocholate
average:		5.57526
