# Supplementary material for: ρ0 Cells Feature De-Ubiquitination of SLC Transporters and Increased Levels and Fluxes of Amino Acids
Source: Int J Mol Sci. 2017 Apr 20;18(4):879. doi: 10.3390/ijms18040879 (PMC5412460; doi:10.3390/ijms18040879)
Supplement: Supplementary file 1 [file ijms-18-00879-s001.zip › Supplementary Table S2.xlsx]

## Sheet: Peak areas
Supplementary Table S2: Integrated peak areas in counts per second (cps) for all six biological replicates (A-F) for each detected amino acid in 143B.TK- and ρ0 cells at time points 2.5. 5. 10. and 20 minutes. Data are normalized for protein content and internal standard, n=6.
Non essential amino acids	143B.TK- 2.5A	143B.TK- 2.5B	143B.TK- 2.5C	143B.TK- 2.5D	143B.TK- 2.5E	143B.TK- 2.5F	143B.TK- 5A	143B.TK- 5B	143B.TK- 5C	143B.TK- 5D	143B.TK- 5E	143B.TK- 5F	143B.TK- 10A	143B.TK- 10B	143B.TK- 10C	143B.TK- 10D	143B.TK- 10E	143B.TK- 10F	143B.TK- 20A	143B.TK- 20B	143B.TK- 20C	143B.TK- 20D	143B.TK- 20E	143B.TK- 20F	ρ0 2.5A	ρ0 2.5B	ρ0 2.5C	ρ0 2.5D	ρ0 2.5E	ρ0 2.5F	ρ0 5A	ρ0 5B	ρ0 5C	ρ0 5D	ρ0 5E	ρ0 5F	ρ0 10A	ρ0 10B	ρ0 10C	ρ0 10D	ρ0 10E	ρ0 10F	ρ0 20A	ρ0 20B	ρ0 20C	ρ0 20D	ρ0 20E	ρ0 20F	average ratio ρ0/143B.TK- 2.5 min
Alanine (94.0 / 47.0)	4.3555e+07	4.47695e+07	4.10342e+07	3.54147e+07	6.03947e+07	5.82994e+07	6.80923e+07	6.19273e+07	6.27713e+07	7.10643e+07	8.33213e+07	8.33072e+07	9.88254e+07	9.01332e+07	8.94225e+07	1.18322e+08	9.6066e+07	1.32174e+08	9.47696e+07	1.03391e+08	1.19697e+08	1.20498e+08	1.33591e+08	1.29598e+08	4.36463e+07	4.33798e+07	4.20181e+07	4.37067e+07	4.82916e+07	4.40794e+07	6.62199e+07	6.52619e+07	6.02529e+07	4.13548e+07	7.62193e+07	6.97873e+07	8.88302e+07	8.60971e+07	8.48304e+07	8.79308e+07	9.8502e+07	8.93702e+07	8.98219e+07	9.86497e+07	8.31745e+07	9.13708e+07	9.74434e+07	8.61064e+07	1.0692
Glutamic acid (154.1 / 89.0)	432718	608799	578215	400460	845470	906398	925876	926902	1.12678e+06	1.06885e+06	1.39224e+06	1.88537e+06	2.81246e+06	2.57512e+06	2.21768e+06	3.04957e+06	3.45676e+06	4.33178e+06	5.89156e+06	7.59192e+06	7.51336e+06	7.47965e+06	1.16255e+07	1.25804e+07	2.3423e+06	1.49029e+06	1.9246e+06	2.13381e+06	2.77489e+06	2.23854e+06	2.87632e+06	2.62515e+06	3.09962e+06	2.52541e+06	3.50496e+06	3.56117e+06	6.23406e+06	5.56653e+06	7.21031e+06	9.5016e+06	7.5634e+06	7.39219e+06	1.88494e+07	1.67394e+07	2.19696e+07	2.14222e+07	2.31327e+07	2.11823e+07	0.292307
Glycine (79.0 / 32.0)	446964	469529	334752	286386	597854	516947	792636	798060	791358	963206	1.05855e+06	1.01114e+06	2.07603e+06	1.82777e+06	1.85999e+06	2.57686e+06	2.15429e+06	3.03461e+06	3.7101e+06	4.12312e+06	4.36456e+06	4.43229e+06	4.87641e+06	5.73408e+06	548608	386360	387859	362457	686713	383030	704291	661316	731362	725939	1.10419e+06	958048	1.59805e+06	1.53596e+06	1.64764e+06	2.68725e+06	1.94357e+06	1.95059e+06	3.44509e+06	3.56914e+06	3.10446e+06	3.18832e+06	3.44673e+06	3.06788e+06	0.962761
Proline (122.1 / 75.0)	8.86547e+07	1.01479e+08	9.3675e+07	6.78558e+07	4.87498e+07	1.41153e+08	1.38441e+08	1.62644e+08	1.58425e+08	1.69283e+08	1.79916e+08	2.15024e+08	3.08332e+08	2.95172e+08	2.99404e+08	4.02335e+08	3.15633e+08	4.49393e+08	3.92062e+08	5.57341e+08	5.92167e+08	7.1475e+08	8.28618e+08	5.75305e+08	7.75382e+07	7.20853e+07	1.16652e+08	1.05152e+08	5.15035e+07	1.16825e+08	1.11105e+08	1.20088e+08	1.72039e+08	7.19954e+07	1.74672e+08	1.54455e+08	2.41806e+08	1.82982e+08	2.63677e+08	2.85832e+08	3.29167e+08	3.56625e+08	5.23926e+08	3.92785e+08	5.49498e+08	6.24883e+08	5.8368e+08	5.50507e+08	1.00336
Serine (110.0 / 63.0)	7.21768e+06	8.12408e+06	6.81694e+06	6.59073e+06	1.27471e+07	1.02457e+07	1.13394e+07	1.02694e+07	1.05079e+07	1.35526e+07	1.6629e+07	1.52029e+07	1.5144e+07	1.48381e+07	1.55038e+07	2.30381e+07	1.73153e+07	2.87836e+07	1.90713e+07	2.15156e+07	2.34882e+07	2.29561e+07	2.51886e+07	3.24395e+07	1.65887e+07	8.85027e+06	9.00352e+06	8.63828e+06	2.09666e+07	9.4958e+06	1.43059e+07	1.19083e+07	1.18396e+07	1.99733e+07	2.50128e+07	1.64538e+07	1.71279e+07	1.54249e+07	1.58677e+07	3.42713e+07	2.06625e+07	2.33127e+07	1.86225e+07	1.98866e+07	1.74065e+07	1.78379e+07	2.49733e+07	1.8819e+07	0.703563
Tyrosine (192.1 / 145.0)	2.22881e+08	2.17392e+08	2.15174e+08	2.92929e+08	1.68136e+08	2.64317e+08	2.45193e+08	2.36765e+08	2.41399e+08	2.52068e+08	3.00138e+08	2.78824e+08	2.93707e+08	2.58934e+08	2.51263e+08	3.1259e+08	2.77494e+08	3.84239e+08	2.79468e+08	3.03755e+08	3.40594e+08	3.47453e+08	4.25898e+08	3.61438e+08	2.61567e+08	2.6205e+08	2.52941e+08	2.61427e+08	1.83254e+08	2.64765e+08	2.69612e+08	3.0423e+08	2.85385e+08	1.78258e+08	3.36816e+08	2.98368e+08	3.35422e+08	2.77543e+08	3.16385e+08	3.37011e+08	3.76033e+08	3.93512e+08	3.71173e+08	3.36025e+08	3.31211e+08	3.63983e+08	3.60431e+08	3.68406e+08	0.929223
Essential amino acids																																																average ratio non-essential AA	0.826734
Histidine (165.1 / 118.0)	4.61468e+06	3.84226e+06	4.13323e+06	4.1442e+06	7.72904e+06	5.50036e+06	4.71341e+06	4.4132e+06	4.96537e+06	4.25478e+06	6.48106e+06	5.82345e+06	4.58214e+06	4.29493e+06	4.07297e+06	5.34457e+06	4.83298e+06	9.47626e+06	5.30549e+06	5.56323e+06	6.1367e+06	5.0865e+06	7.36745e+06	8.0365e+06	6.1633e+06	5.4882e+06	4.67806e+06	4.49551e+06	5.1748e+06	5.40045e+06	6.40465e+06	6.34548e+06	5.18586e+06	4.16013e+06	6.75793e+06	6.99554e+06	6.26205e+06	6.86609e+06	5.7356e+06	6.01031e+06	6.6564e+06	6.15278e+06	5.8775e+06	7.12317e+06	4.85921e+06	5.79733e+06	5.90698e+06	6.37063e+06	0.95425
Isoleucine (139.1 / 92.0)	2.20736e+08	2.45754e+08	2.78773e+08	2.13971e+08	3.09846e+08	3.94571e+08	2.89526e+08	2.83982e+08	3.25754e+08	3.47728e+08	4.54101e+08	5.75545e+08	4.8954e+08	4.18697e+08	3.50126e+08	4.18875e+08	4.86177e+08	6.16552e+08	5.45439e+08	5.87317e+08	5.84648e+08	6.23094e+08	8.20368e+08	8.01852e+08	5.59325e+08	5.80111e+08	4.50666e+08	4.91066e+08	4.50961e+08	5.72456e+08	5.76364e+08	6.49222e+08	5.41479e+08	4.06507e+08	5.96305e+08	8.14593e+08	7.83071e+08	6.58267e+08	6.87968e+08	6.28546e+08	7.87354e+08	8.15059e+08	9.23891e+08	7.44339e+08	7.8919e+08	7.61585e+08	7.7621e+08	8.92816e+08	0.535869
Leucine (139.1 / 92.0)	2.16702e+08	2.19568e+08	2.29153e+08	2.07646e+08	3.16281e+08	2.98456e+08	2.79763e+08	2.53894e+08	2.76783e+08	2.67255e+08	3.22477e+08	4.296e+08	3.83706e+08	3.35008e+08	2.79467e+08	3.93527e+08	3.34162e+08	3.65568e+08	3.26339e+08	4.1419e+08	4.36607e+08	4.1363e+08	5.41689e+08	4.84346e+08	5.83867e+08	5.47391e+08	4.1712e+08	4.61599e+08	4.95307e+08	5.09362e+08	5.74438e+08	5.60087e+08	5.178e+08	3.6872e+08	4.87873e+08	5.23405e+08	6.46635e+08	6.49385e+08	6.44252e+08	5.53417e+08	5.60328e+08	5.5493e+08	6.98379e+08	6.79333e+08	6.10382e+08	6.36136e+08	5.43824e+08	5.83563e+08	0.493526
Lysine (155.1 / 90.0)	1.82802e+06	1.39197e+06	1.62904e+06	1.82199e+06	3.23812e+06	1.87503e+06	1.60528e+06	1.53625e+06	1.53052e+06	1.99162e+06	2.35902e+06	1.8299e+06	1.66065e+06	1.35493e+06	1.41141e+06	1.9417e+06	1.51295e+06	2.62383e+06	1.63793e+06	1.67492e+06	2.1789e+06	1.60272e+06	2.04605e+06	2.45718e+06	5.97691e+06	2.16613e+06	1.6724e+06	2.37477e+06	9.19204e+06	2.65773e+06	3.15831e+06	2.29633e+06	1.60929e+06	5.30548e+06	5.10481e+06	2.30842e+06	2.03044e+06	1.85203e+06	1.59507e+06	4.6617e+06	2.04833e+06	1.65697e+06	1.29464e+06	1.51039e+06	935697	1.1867e+06	1.17663e+06	1.42563e+06	0.490191
Methionine (156.1 / 109.0)	4.60352e+07	3.10601e+07	3.08783e+07	2.70391e+07	5.54519e+07	4.29892e+07	5.24396e+07	5.24234e+07	5.04903e+07	3.42116e+07	5.98423e+07	9.55662e+07	6.6798e+07	6.47921e+07	4.37965e+07	1.21552e+08	7.6475e+07	9.53916e+07	6.14756e+07	8.06152e+07	7.5487e+07	5.78611e+07	9.52105e+07	1.04637e+08	1.06848e+08	9.40609e+07	6.68837e+07	5.42306e+07	6.87691e+07	5.80091e+07	1.19936e+08	1.18539e+08	1.0622e+08	6.77473e+07	7.47793e+07	1.22326e+08	1.38395e+08	1.46281e+08	1.44289e+08	1.07504e+08	1.21632e+08	1.51237e+08	1.53036e+08	1.51039e+08	1.45353e+08	1.23504e+08	1.06765e+08	1.59628e+08	0.520172
Phenylalanine (176.1 / 129.0)	1.00498e+09	8.73339e+08	8.45328e+08	7.33595e+08	1.00156e+09	1.01998e+09	1.06592e+09	1.01936e+09	9.36427e+08	7.99123e+08	1.12065e+09	1.40665e+09	1.28421e+09	1.16914e+09	8.40278e+08	1.1245e+09	1.13606e+09	1.2903e+09	9.95375e+08	1.34072e+09	1.26839e+09	1.16883e+09	1.49259e+09	1.54659e+09	1.44064e+09	1.27467e+09	1.23042e+09	1.14064e+09	1.30055e+09	1.27744e+09	1.43472e+09	1.36693e+09	1.32424e+09	9.35529e+08	1.19491e+09	1.35709e+09	1.56166e+09	1.62738e+09	1.77629e+09	1.34405e+09	1.36174e+09	1.46309e+09	1.7814e+09	1.65332e+09	1.66887e+09	1.43509e+09	1.35195e+09	1.54264e+09	0.714838
Threonine (125.1 / 78.0)	1.17834e+07	1.16131e+07	1.10303e+07	9.78612e+06	1.39314e+07	1.86322e+07	1.60048e+07	1.57187e+07	1.65256e+07	1.8934e+07	2.06704e+07	2.2424e+07	2.14612e+07	2.15918e+07	2.18601e+07	3.04272e+07	2.36387e+07	3.60753e+07	2.29076e+07	2.60943e+07	2.83001e+07	3.09108e+07	3.16132e+07	3.02429e+07	1.52063e+07	1.18037e+07	1.39815e+07	1.35402e+07	1.54625e+07	1.4261e+07	1.74835e+07	1.71885e+07	1.72376e+07	1.40353e+07	2.36016e+07	1.96162e+07	2.3327e+07	2.06492e+07	2.40574e+07	2.8127e+07	2.82025e+07	2.84326e+07	2.44518e+07	2.45181e+07	2.4687e+07	2.47425e+07	2.71713e+07	2.55173e+07	0.911238
Valine (124.1 / 77.0)	1.87522e+08	1.81196e+08	1.81123e+08	1.77473e+08	2.25162e+08	2.51843e+08	2.96008e+08	2.81405e+08	2.95435e+08	2.87394e+08	3.59554e+08	4.32911e+08	4.85733e+08	4.29493e+08	3.95804e+08	4.42853e+08	4.65668e+08	6.36206e+08	5.25341e+08	6.10562e+08	6.53143e+08	6.28391e+08	8.28618e+08	7.51031e+08	2.47122e+08	2.4719e+08	2.10458e+08	2.07139e+08	2.39828e+08	2.07577e+08	4.09507e+08	3.85756e+08	3.38579e+08	3.1861e+08	3.54672e+08	3.75214e+08	5.96819e+08	6.03542e+08	6.18382e+08	5.69241e+08	5.9217e+08	5.69685e+08	8.15957e+08	8.11544e+08	7.55351e+08	7.70893e+08	7.31587e+08	7.60155e+08	0.885976
																																																average ratio essential AA	0.688258
[truncated: 3 more columns]
