# Supplementary material for: ρ0 Cells Feature De-Ubiquitination of SLC Transporters and Increased Levels and Fluxes of Amino Acids
Source: Int J Mol Sci. 2017 Apr 20;18(4):879. doi: 10.3390/ijms18040879 (PMC5412460; doi:10.3390/ijms18040879)
Supplement: Supplementary file 1 [file ijms-18-00879-s001.zip › Supplementary Table S3.xlsx]

## Sheet: Amino acid composition of media
Supplementary Table S3: Concentration of amino acids in 13C15N and 12C14N labeled cell culture media.
	unlabeled amino acids mg/L	labeled amino acids mg/L
L-Arginine	84	44
L-Cystine	48	17
L-Alanine	440	118
L-Glutamine (Glutamax)	2 mM	-
L-Glycine	30	49
L-Histidine	42	4
L-Isoleucine	105	95
L-Leucine	105	159
L-Lysine	146	31
L-Methionine	30	190
L-Phenylalanine	66	104
L-Serine	42	32
L-Threonine	95	33
L-Tryptophan	16	-, but unlabeled 16
L-Tyrosine	72	62
L-Valine	94	103
L-Proline	-	5
L-Asparagine	-	-
L-Glutamic acid	-	89
L-Aspartic acid	-	37
