# Supplementary material for: ρ0 Cells Feature De-Ubiquitination of SLC Transporters and Increased Levels and Fluxes of Amino Acids
Source: Int J Mol Sci. 2017 Apr 20;18(4):879. doi: 10.3390/ijms18040879 (PMC5412460; doi:10.3390/ijms18040879)
Supplement: Supplementary file 1 [file ijms-18-00879-s001.zip › Supplementary Table S4.xlsx]

## Sheet: Inhibitor study
Supplementary Table S4: Integrated peak areas in counts per second (cps) for all three biological replicates (A-C) for each detected 13C15N labeled amino acid in ρ0 and 143B.TK- cells at time points 0 (control without GPNA) and after 10 minutes incubation with the SLC inhibitor GPNA. Data are normalized for protein content and internal standard, n=3.
13C amino acids	143B.TK- Ctrl A	143B.TK- Ctrl B	143B.TK- Ctrl C	143B.TK- GPNA A	143B.TK- GPNA B	143B.TK- GPNA C	ρ0 Ctrl A	ρ0 Ctrl B	ρ0 Ctrl C	ρ0 GPNA A	ρ0 GPNA B	ρ0 GPNA C	average ratio GPNA/Ctrl 143B.TK-	average ratio GPNA/Ctrl ρ0
L-Alanine (94,0 / 47,0)	59200000	5.38301e+07	5.58305e+07	3.76203e+07	4.11005e+07	3.74665e+07	4.41311e+07	4.62448e+07	4.80137e+07	4.28242e+07	4.95103e+07	4.56588e+07	0.688067	0.997137
L-Glutamic acid (154,1 / 89,0)	2840000	3.26774e+06	2.94883e+06	1.54416e+06	1.4059e+06	1.72854e+06	3.90725e+06	3.78891e+06	4.11797e+06	2.97458e+06	3.8202e+06	2.23099e+06	0.516597	0.763981
L-Glycine (79,0 / 32,0)	1639000	1.71498e+06	1.66561e+06	925874	802965	964849	1.17002e+06	1.04764e+06	977658	994425	1.23957e+06	658543	0.536636	0.905242
L-Histidine (165,1 / 118,0)	3160000	3.37763e+06	3.52564e+06	1.54977e+06	1.39762e+06	1.18381e+06	4.99109e+06	4.38798e+06	4.35321e+06	2.59113e+06	3.10376e+06	2.50987e+06	0.410522	0.597479
L-Isoleucine (139.1 / 92.0)	288500000	2.46781e+08	2.50636e+08	1.72722e+08	1.87515e+08	1.61461e+08	3.85854e+08	4.16711e+08	3.77108e+08	2.92448e+08	3.57977e+08	3.61625e+08	0.663807	0.857907
L-Leucine (139.1 / 92.0)	336900000	3.25532e+08	2.89875e+08	2.01862e+08	2.16774e+08	1.56714e+08	4.95643e+08	4.83264e+08	4.60919e+08	3.45722e+08	4.45327e+08	3.78576e+08	0.604164	0.812338
L-Lysine (155,1 / 90,0)	1607000	1.38598e+06	1.26732e+06	4.75141e+06	3.05563e+06	3.04112e+06	1.15597e+06	869093	774950	2.68214e+06	2.49485e+06	1.70368e+06	2.54634	2.45737
L-Methionine (156,1 / 109,0)	54560000	4.60597e+07	4.44711e+07	2.63877e+07	2.14658e+07	1.81458e+07	1.01639e+08	6.86635e+07	8.3093e+07	4.72518e+07	4.94137e+07	3.72743e+07	0.454882	0.52858
L-Phenylalanine (176,1 / 129,0)	1213000000	1.05698e+09	9.36793e+08	6.76193e+08	7.88979e+08	5.67279e+08	1.28431e+09	1.44833e+09	1.27989e+09	9.77451e+08	1.40871e+09	1.35573e+09	0.6338	0.932554
L-Proline (122,1 / 75,0)	312200000	3.48032e+08	3.23046e+08	1.38912e+08	2.0334e+08	2.25784e+08	1.42107e+08	2.67481e+08	2.35404e+08	1.3426e+08	2.6507e+08	2.087e+08	0.577697	0.942694
L-Serine (110,0 / 63,0)	16130000	1.3415e+07	1.48119e+07	1.10644e+07	9.937e+06	9.59509e+06	1.63934e+07	1.37796e+07	1.14672e+07	1.55325e+07	1.58631e+07	8.76539e+06	0.689779	0.964476
L-Threonine (125,1 / 78,0)	30080000	2.50706e+07	2.64659e+07	2.15e+07	2.24411e+07	1.87392e+07	2.58735e+07	2.47154e+07	2.21289e+07	2.71895e+07	2.97932e+07	2.35676e+07	0.767985	1.10771
L-Tyrosine (192,1 / 145,0)	152000000	1.38467e+08	1.38221e+08	9.66346e+07	1.06455e+08	8.66347e+07	1.36955e+08	1.79624e+08	1.48961e+08	1.28534e+08	1.69021e+08	1.43392e+08	0.675839	0.947174
L-Valine (124,1 / 77,0)	352100000	3.47966e+08	3.44257e+08	2.14688e+08	2.24319e+08	1.9831e+08	3.68805e+08	4.07525e+08	4.31414e+08	2.82222e+08	3.58581e+08	2.83248e+08	0.610268	0.765106
												median ratio	0.622034	0.918898
