# Supplementary material for: ρ0 Cells Feature De-Ubiquitination of SLC Transporters and Increased Levels and Fluxes of Amino Acids
Source: Int J Mol Sci. 2017 Apr 20;18(4):879. doi: 10.3390/ijms18040879 (PMC5412460; doi:10.3390/ijms18040879)
Supplement: Supplementary file 1 [file ijms-18-00879-s001.zip › Supplementary Table S5.xlsx]

## Sheet: MRM ion ratios
Supplementary Table S5. List of all amino acids and their 13C15N labeled forms with transitions, MS conditions and MRM ion ratios.
Metabolite	HMDB ID	KEGG ID	Q1 mass	Q3 mass	RT	Metabolite	DP	CE	CXP	ionization	Q3 mass ratios	LC Method	additional information
D-Glucose	HMDB00122	C00031	179.0634	89	11.42	D-Glucose	-30	-12	-7	-	1	HILIC_ACN pH3.5
D-Glucose	HMDB00123	C00032	179.0634	59	11.42	D-Glucose	-30	-22	-9	-	0.609108	HILIC_ACN pH3.5
D-Glucose	HMDB00124	C00033	179.0634	71	11.42	D-Glucose	-30	-22	-6	-	0.345885	HILIC_ACN pH3.5
D-Glucose 13C6			185.063	92	11.42	D-Glucose 13C6	-30	-12	-7	-	1	HILIC_ACN pH3.5
D-Glucose 13C6			185.063	61	11.42	D-Glucose 13C6	-30	-22	-9	-	0.609108	HILIC_ACN pH3.5
D-Glucose 13C6			185.063	74	11.42	D-Glucose 13C6	-30	-22	-6	-	0.345885	HILIC_ACN pH3.5
L-Alanine	HMDB00161	C00041	90.0477	90	17.84	L-Alanine	5	6	5	+	1	HILIC_ACN pH3.5	pseudo MRM
L-Alanine	HMDB00161	C00041	90.0477	44	17.84	L-Alanine	5	16	5	+	0.96	HILIC_ACN pH3.5
L-Alanine 13C315N			94.0477	94	17.84	L-Alanine 13C315N	5	6	5	+	1	HILIC_ACN pH3.5	pseudo MRM
L-Alanine 13C315N			94.0477	47	17.84	L-Alanine 13C315N	5	16	5	+	0.96	HILIC_ACN pH3.5
L-Arginine	HMDB00517	C00062	175.1117	70	28.18	L-Arginine	67	27	6	+	1	HILIC_ACN pH3.5
L-Arginine	HMDB00517	C00062	175.1117	116	28.18	L-Arginine	67	19	10	+	0.356278	HILIC_ACN pH3.5
L-Arginine	HMDB00517	C00062	175.1117	60	28.18	L-Arginine	67	19	13	+	0.315823	HILIC_ACN pH3.5
L-Arginine 13C615N2			183.112	75	28.18	L-Arginine 13C615N2	67	27	6	+	1	HILIC_ACN pH3.5
L-Arginine 13C615N2			183.112	122	28.18	L-Arginine 13C615N2	67	19	10	+	0.356278	HILIC_ACN pH3.5
L-Arginine 13C615N2			183.112	64	28.18	L-Arginine 13C615N2	67	19	13	+	0.315823	HILIC_ACN pH3.5
L-Aspartic acid	HMDB00191	C00049	134.037	88	23.18	L-Aspartic acid	51	15	10	+	1	HILIC_ACN pH3.5
L-Aspartic acid	HMDB00191	C00049	134.037	74	23.18	L-Aspartic acid	51	15	10	+	0.852216	HILIC_ACN pH3.5
L-Aspartic acid	HMDB00191	C00049	134.037	116	23.18	L-Aspartic acid	51	11	10	+	0.588937	HILIC_ACN pH3.5
L-Aspartic acid 13C415N			139.037	92	23.18	L-Aspartic acid 13C415N	51	15	10	+	1	HILIC_ACN pH3.5
L-Aspartic acid 13C415N			139.037	77	23.18	L-Aspartic acid 13C415N	51	15	10	+	0.852216	HILIC_ACN pH3.5
L-Aspartic acid 13C415N			139.037	121	23.18	L-Aspartic acid 13C415N	51	11	10	+	0.588937	HILIC_ACN pH3.5
L-Glutamic acid	HMDB00148	C00025	148.0532	84	19.37	L-Glutamic acid	53	21	10	+	1	HILIC_ACN pH3.5
L-Glutamic acid	HMDB00148	C00025	148.0532	130	19.37	L-Glutamic acid	53	13	13	+	0.513409	HILIC_ACN pH3.5
L-Glutamic acid	HMDB00148	C00025	148.0532	102	19.37	L-Glutamic acid	53	15	9	+	0.305857	HILIC_ACN pH3.5
L-Glutamic acid 13C515N			154.053	89	19.37	L-Glutamic acid 13C515N	53	21	10	+	1	HILIC_ACN pH3.5
L-Glutamic acid 13C515N			154.053	136	19.37	L-Glutamic acid 13C515N	53	13	13	+	0.513409	HILIC_ACN pH3.5
L-Glutamic acid 13C515N			154.053	107	19.37	L-Glutamic acid 13C515N	53	15	9	+	0.305857	HILIC_ACN pH3.5
L-Glycine	HMDB00123	C00037	76.032	76	19.39	L-Glycine	1	5	13	+	1	HILIC_ACN pH3.5	pseudo MRM
L-Glycine	HMDB00123	C00037	76.032	30	19.39	L-Glycine	1	19	14	+	0.26	HILIC_ACN pH3.5
L-Glycine	HMDB00123	C00037	76.032	48	19.39	L-Glycine	1	9	12	+	0.02	HILIC_ACN pH3.5
L-Glycine 13C215N			79.032	79	19.39	L-Glycine 13C215N	1	5	13	+	1	HILIC_ACN pH3.5	pseudo MRM
L-Glycine 13C215N			79.032	32	19.39	L-Glycine 13C215N	1	19	14	+	0.26	HILIC_ACN pH3.5
L-Histidine	HMDB00177	C00135	156.0695	110	28.75	L-Histidine	1	19	11	+	1	HILIC_ACN pH3.5
L-Histidine	HMDB00177	C00135	156.0695	83	28.75	L-Histidine	1	34	13	+	0.274858	HILIC_ACN pH3.5
L-Histidine	HMDB00177	C00135	156.0695	93	28.75	L-Histidine	1	31	14	+	0.178091	HILIC_ACN pH3.5
L-Histidine 13C615N3			165.07	118	28.75	L-Histidine 13C615N3	1	19	11	+	1	HILIC_ACN pH3.5
L-Histidine 13C615N3			165.07	89	28.75	L-Histidine 13C615N3	1	34	13	+	0.274858	HILIC_ACN pH3.5
L-Histidine 13C615N3			165.07	100	28.75	L-Histidine 13C615N3	1	31	14	+	0.178091	HILIC_ACN pH3.5
L-Isoleucine	HMDB00172	C00407	132.0946	86	12.43	L-Isoleucine	40	15	11	+	1	HILIC_ACN pH3.5
L-Isoleucine	HMDB00172	C00407	132.0946	69	12.43	L-Isoleucine	40	23	10	+	0.142878	HILIC_ACN pH3.5
L-Isoleucine	HMDB00172	C00407	132.0946	56	12.43	L-Isoleucine	40	51	9	+	0.0330784	HILIC_ACN pH3.5
L-Isoleucine 13C615N			139.095	92	12.43	L-Isoleucine 13C615N	40	15	11	+	1	HILIC_ACN pH3.5
L-Isoleucine 13C615N			139.095	74	12.43	L-Isoleucine 13C615N	40	23	10	+	0.142878	HILIC_ACN pH3.5
L-Isoleucine 13C615N			139.095	60	12.43	L-Isoleucine 13C615N	40	51	9	+	0.0330784	HILIC_ACN pH3.5
L-Leucine	HMDB00687	C00123	132.0946	86	12.03	L-Leucine	40	15	7	+	1	HILIC_ACN pH3.5
L-Leucine	HMDB00687	C00123	132.0946	44	12.03	L-Leucine	40	31	7	+	0.120895	HILIC_ACN pH3.5
L-Leucine	HMDB00687	C00123	132.0946	43	12.03	L-Leucine	40	35	7	+	0.106748	HILIC_ACN pH3.5
L-Leucine 13C615N			139.095	92	12.03	L-Leucine 13C615N	40	15	7	+	1	HILIC_ACN pH3.5
L-Leucine 13C615N			139.095	47	12.03	L-Leucine 13C615N	40	31	7	+	0.120895	HILIC_ACN pH3.5
L-Leucine 13C615N			139.095	46	12.03	L-Leucine 13C615N	40	35	7	+	0.106748	HILIC_ACN pH3.5
L-Lysine	HMDB00182	C00047	147.1055	84	29.12	L-Lysine	55	30	7	+	1	HILIC_ACN pH3.5
L-Lysine	HMDB00182	C00047	147.1055	130	29.12	L-Lysine	55	13	10	+	0.73	HILIC_ACN pH3.5
L-Lysine	HMDB00182	C00047	147.1055	56	29.12	L-Lysine	55	39	8	+	0.13	HILIC_ACN pH3.5
L-Lysine 13C615N2			155.106	90	29.12	L-Lysine 13C615N2	55	30	7	+	1	HILIC_ACN pH3.5
L-Lysine 13C615N2			155.106	137	29.12	L-Lysine 13C615N2	55	13	10	+	0.73	HILIC_ACN pH3.5
L-Lysine 13C615N2			155.106	60	29.12	L-Lysine 13C615N2	55	39	8	+	0.13	HILIC_ACN pH3.5
L-Methionine	HMDB00696	C00073	150.051	104	13.46	L-Methionine	60	14	11	+	1	HILIC_ACN pH3.5
L-Methionine	HMDB00696	C00073	150.051	56	13.46	L-Methionine	60	22	10	+	0.891311	HILIC_ACN pH3.5
L-Methionine	HMDB00696	C00073	150.051	133	13.46	L-Methionine	60	13	11	+	0.794631	HILIC_ACN pH3.5
L-Methionine 13C515N			156.051	109	13.46	L-Methionine 13C515N	60	14	11	+	1	HILIC_ACN pH3.5
L-Methionine 13C515N			156.051	60	13.46	L-Methionine 13C515N	60	22	10	+	0.891311	HILIC_ACN pH3.5
L-Methionine 13C515N			156.051	138	13.46	L-Methionine 13C515N	60	13	11	+	0.794631	HILIC_ACN pH3.5
L-Phenylalanine	HMDB00159	C00079	166.079	120	11.72	L-Phenylalanine	50	19	11	+	1	HILIC_ACN pH3.5
L-Phenylalanine	HMDB00159	C00079	166.079	103	11.72	L-Phenylalanine	50	35	8	+	0.35	HILIC_ACN pH3.5
L-Phenylalanine	HMDB00159	C00079	166.079	77	11.72	L-Phenylalanine	50	51	7	+	0.34	HILIC_ACN pH3.5
L-Phenylalanine 13C915N			176.079	129	11.72	L-Phenylalanine 13C915N	50	19	11	+	1	HILIC_ACN pH3.5
L-Phenylalanine 13C915N			176.079	111	11.72	L-Phenylalanine 13C915N	50	35	8	+	0.35	HILIC_ACN pH3.5
L-Phenylalanine 13C915N			176.079	83	11.72	L-Phenylalanine 13C915N	50	51	7	+	0.34	HILIC_ACN pH3.5
L-Proline	HMDB00162	C00148	116.0633	70	15.52	L-Proline	51	23	11	+	1	HILIC_ACN pH3.5
L-Proline	HMDB00162	C00148	116.0633	116	15.52	L-Proline	51	5	11	+	0.676778	HILIC_ACN pH3.5	pseudo MRM
L-Proline	HMDB00162	C00148	116.0633	43	15.52	L-Proline	51	41	11	+	0.0225471	HILIC_ACN pH3.5
L-Proline 13C515N			122.063	75	15.52	L-Proline 13C515N	51	23	11	+	1	HILIC_ACN pH3.5
L-Proline 13C515N			122.063	122	15.52	L-Proline 13C515N	51	5	11	+	0.676778	HILIC_ACN pH3.5	pseudo MRM
L-Proline 13C515N			122.063	46	15.52	L-Proline 13C515N	51	41	11	+	0.0225471	HILIC_ACN pH3.5
L-Serine	HMDB00187	C00065	106.0426	60	19.8	L-Serine	5	15	7	+	1	HILIC_ACN pH3.5
L-Serine	HMDB00187	C00065	106.0426	42	19.8	L-Serine	5	30	7	+	0.219863	HILIC_ACN pH3.5
L-Serine	HMDB00187	C00065	106.0426	88	19.8	L-Serine	5	13	7	+	0.152672	HILIC_ACN pH3.5
L-Serine 13C315N			110.043	63	19.8	L-Serine 13C315N	5	15	7	+	1	HILIC_ACN pH3.5
L-Serine 13C315N			110.043	45	19.8	L-Serine 13C315N	5	30	7	+	0.219863	HILIC_ACN pH3.5
L-Serine 13C315N			110.043	92	19.8	L-Serine 13C315N	5	13	7	+	0.152672	HILIC_ACN pH3.5
L-Threonine	HMDB00167	C00188	120.0582	74	18.12	L-Threonine	45	15	8	+	1	HILIC_ACN pH3.5
L-Threonine	HMDB00167	C00188	120.0582	56	18.12	L-Threonine	45	22	10	+	0.671537	HILIC_ACN pH3.5
L-Threonine	HMDB00167	C00188	120.0582	102	18.12	L-Threonine	45	13	8	+	0.420418	HILIC_ACN pH3.5
L-Threonine 13C415N			125.058	78	18.12	L-Threonine 13C415N	45	15	8	+	1	HILIC_ACN pH3.5
L-Threonine 13C415N			125.058	60	18.12	L-Threonine 13C415N	45	22	10	+	0.671537	HILIC_ACN pH3.5
L-Threonine 13C415N			125.058	107	18.12	L-Threonine 13C415N	45	13	8	+	0.420418	HILIC_ACN pH3.5
L-Tyrosine	HMDB00158	C00082	182.0739	136	15.04	L-Tyrosine	5	17	7	+	1	HILIC_ACN pH3.5
L-Tyrosine	HMDB00158	C00082	182.0739	165	15.04	L-Tyrosine	5	12	8	+	0.87297	HILIC_ACN pH3.5
L-Tyrosine	HMDB00158	C00082	182.0739	91	15.04	L-Tyrosine	5	38	7	+	0.816594	HILIC_ACN pH3.5
L-Tyrosine 13C915N			192.074	145	15.04	L-Tyrosine 13C915N	5	17	7	+	1	HILIC_ACN pH3.5
L-Tyrosine 13C915N			192.074	174	15.04	L-Tyrosine 13C915N	5	12	8	+	0.87297	HILIC_ACN pH3.5
L-Tyrosine 13C915N			192.074	98	15.04	L-Tyrosine 13C915N	5	38	7	+	0.816594	HILIC_ACN pH3.5
L-Valine	HMDB00883	C00183	118.079	72	14.36	L-Valine	30	16	11	+	1	HILIC_ACN pH3.5
L-Valine	HMDB00883	C00183	118.079	55	14.36	L-Valine	30	27	9	+	0.372445	HILIC_ACN pH3.5
L-Valine	HMDB00883	C00183	118.079	57	14.36	L-Valine	30	38	10	+	0.0801187	HILIC_ACN pH3.5
L-Valine 13C515N			124.079	77	14.36	L-Valine 13C515N	30	16	11	+	1	HILIC_ACN pH3.5
L-Valine 13C515N			124.079	59	14.36	L-Valine 13C515N	30	27	9	+	0.372445	HILIC_ACN pH3.5
L-Valine 13C515N			124.079	61	14.36	L-Valine 13C515N	30	38	10	+	0.0801187	HILIC_ACN pH3.5
Valine, 2,3,4,4,4,5,5,5-d8-	Standard		126.079	80	14.45	Valine, 2,3,4,4,4,5,5,5-d8-	30	16	11	+	1	Internal Standard
Valine, 2,3,4,4,4,5,5,5-d8-	Standard		126.079	62	14.45	Valine, 2,3,4,4,4,5,5,5-d8-	30	27	9	+	0.372445	Internal Standard
